# Supplementary material
Source: Springer Nature journal article supplement (https://www.springermedizin.de/resource/supplementary/13048_2011_64_MOESM4_ESM.pdf/9664858)

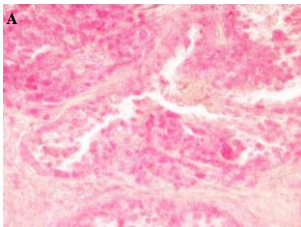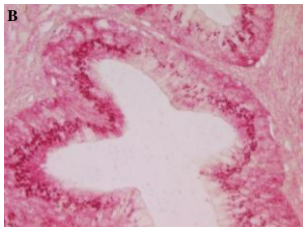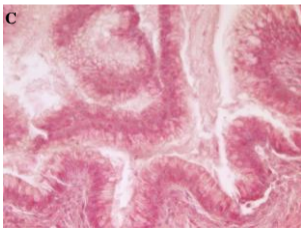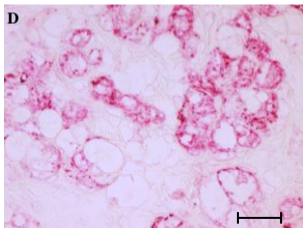

Supplement: MOESM4 [file 9664858]
